# Supplementary material for: Nonlinear relationship between fibrinogen-to-albumin ratio and mortality in critically ill patients with sepsis: a retrospective cohort study
Source: Front Nutr. 2025 Jun 18;12:1562091. doi: 10.3389/fnut.2025.1562091 (PMC12213360; doi:10.3389/fnut.2025.1562091)
Supplement: Supplementary file 3 [file Table_3.xlsx]

## Sheet: COX detial
Variable	28-day mortality				90-day mortality				1-year mortality
	crude		adjusted		crude		adjusted		crude		adjusted
	HR(95%CI)	P value	HR(95%CI)	P value	HR(95%CI)	P value	HR(95%CI)	P value	HR(95%CI)	P value	HR(95%CI)	P value
Age	1.02 (1.01~1.02)	<0.001	1.02 (1.01~1.02)	<0.001	1.02 (1.01~1.02)	<0.001	1.02 (1.01~1.02)	<0.001	1.02 (1.02~1.02)	<0.001	1.02 (1.02~1.02)	<0.001
Gender,male	0.88 (0.79~0.98)	0.025	0.93 (0.83~1.05)	0.233	0.89 (0.8~0.98)	0.019	0.94 (0.85~1.04)	0.244	0.89 (0.82~0.98)	0.014	0.94 (0.86~1.04)	0.219
Heat rate	1 (1~1.01)	0.001	1 (1~1)	0.488	1 (1~1.01)	<0.001	1 (1~1)	0.144	1 (1~1.01)	0.001	1 (1~1.01)	0.037
Mean blood pressure	1 (0.99~1)	0.027	1 (1~1.01)	0.15	1 (0.99~1)	0.065	1 (1~1.01)	0.022	1 (0.99~1)	0.004	1 (1~1)	0.078
Respiratory rate	1.03 (1.02~1.04)	<0.001	1.02 (1.01~1.03)	<0.001	1.03 (1.02~1.04)	<0.001	1.01 (1~1.02)	0.002	1.02 (1.02~1.03)	<0.001	1.01 (1~1.02)	0.021
Temperature	0.8 (0.76~0.83)	<0.001	0.83 (0.79~0.88)	<0.001	0.82 (0.79~0.86)	<0.001	0.85 (0.81~0.89)	<0.001	0.84 (0.81~0.87)	<0.001	0.85 (0.81~0.89)	<0.001
SPO2	0.98 (0.97~0.99)	<0.001	1.01 (1~1.02)	0.244	0.98 (0.97~0.99)	<0.001	1.01 (0.99~1.02)	0.314	0.98 (0.97~0.99)	<0.001	1 (1~1.01)	0.342
Myocardial infarction, yes	1.2 (1.04~1.37)	0.01	1.18 (1.01~1.37)	0.039	1.19 (1.05~1.34)	0.006	1.12 (0.98~1.29)	0.105	1.2 (1.07~1.34)	0.001	1.11 (0.98~1.25)	0.115
Congestive heart failure, yes	1.22 (1.09~1.37)	0.001	1.07 (0.93~1.23)	0.349	1.32 (1.2~1.47)	<0.001	1.18 (1.04~1.33)	0.008	1.37 (1.25~1.51)	<0.001	1.17 (1.05~1.31)	0.004
Diabetes mellitus, yes	1.02 (0.9~1.15)	0.793	0.9 (0.78~1.03)	0.131	1.08 (0.97~1.2)	0.157	0.93 (0.82~1.06)	0.265	1.13 (1.03~1.25)	0.011	0.97 (0.87~1.08)	0.566
Peripheral vascular disease, yes	0.95 (0.81~1.12)	0.559	0.94 (0.78~1.11)	0.455	1 (0.87~1.15)	0.972	0.97 (0.83~1.13)	0.705	1.04 (0.92~1.18)	0.507	0.99 (0.86~1.13)	0.843
Cerebrovascular disease, yes	1.19 (1.03~1.38)	0.016	1.36 (1.17~1.59)	<0.001	1.31 (1.15~1.48)	<0.001	1.52 (1.33~1.73)	<0.001	1.26 (1.12~1.42)	<0.001	1.48 (1.31~1.67)	<0.001
Chronic pulmonary disease, yes	1.08 (0.95~1.22)	0.241	1 (0.88~1.14)	0.985	1.1 (0.98~1.23)	0.098	0.99 (0.88~1.11)	0.848	1.21 (1.09~1.33)	<0.001	1.06 (0.96~1.18)	0.25
Chronic kidney disease, yes	1.18 (1.04~1.35)	0.011	0.99 (0.85~1.16)	0.945	1.27 (1.13~1.42)	<0.001	1.02 (0.89~1.17)	0.818	1.44 (1.3~1.59)	<0.001	1.11 (0.98~1.26)	0.09
Severe liver disease, yes	1.65 (1.44~1.89)	<0.001	1.44 (1.2~1.73)	<0.001	1.66 (1.47~1.87)	<0.001	1.56 (1.33~1.84)	<0.001	1.58 (1.41~1.77)	<0.001	1.54 (1.33~1.78)	<0.001
Malignant cancer, yes	1.55 (1.35~1.78)	<0.001	1.03 (0.86~1.24)	0.724	1.63 (1.44~1.84)	<0.001	1.06 (0.9~1.24)	0.496	1.79 (1.6~2)	<0.001	1.19 (1.03~1.37)	0.018
Metastatic solid tumor, yes	2.53 (2.11~3.03)	<0.001	2.1 (1.67~2.66)	<0.001	2.74 (2.33~3.21)	<0.001	2.28 (1.85~2.81)	<0.001	2.93 (2.52~3.4)	<0.001	2.2 (1.82~2.66)	<0.001
APSIII	1.02 (1.02~1.02)	<0.001	1.02 (1.01~1.02)	<0.001	1.02 (1.02~1.02)	<0.001	1.02 (1.01~1.02)	<0.001	1.02 (1.02~1.02)	<0.001	1.01 (1.01~1.02)	<0.001
SOFA	1.1 (1.08~1.11)	<0.001	0.95 (0.92~0.97)	<0.001	1.09 (1.08~1.11)	<0.001	0.95 (0.93~0.97)	<0.001	1.08 (1.07~1.1)	<0.001	0.96 (0.94~0.98)	<0.001
White blood cell,, yes	1 (1~1.01)	0.003	1.01 (1~1.01)	<0.001	1 (1~1.01)	0.012	1 (1~1.01)	0.001	1 (1~1)	0.036	1 (1~1.01)	0.011
Hemoglobin	0.96 (0.95~0.98)	0.001	1.04 (0.98~1.1)	0.21	0.96 (0.94~0.98)	<0.001	1.02 (0.97~1.08)	0.387	0.95 (0.93~0.96)	<0.001	1.02 (0.97~1.07)	0.47
Platelets	1 (1~1)	0.015	1 (1~1)	<0.001	1 (1~1)	0.004	1 (1~1)	<0.001	1 (1~1)	<0.001	1 (1~1)	<0.001
ALT	1 (1~1)	0.648	1 (1~1)	0.588	1 (1~1)	0.713	1 (1~1)	0.247	1 (1~1)	0.096	1 (1~1)	0.118
ALP	1 (1~1)	<0.001	1 (1~1)	<0.001	1 (1~1)	<0.001	1 (1~1)	<0.001	1 (1~1)	<0.001	1 (1~1)	<0.001
AST	1 (1~1)	0.28	1 (1~1)	0.999	1 (1~1)	0.699	1 (1~1)	0.82	1 (1~1)	0.381	1 (1~1)	0.855
Total bilirubin	1.03 (1.02~1.04)	<0.001	1.02 (1.01~1.03)	<0.001	1.03 (1.02~1.04)	<0.001	1.02 (1.01~1.02)	<0.001	1.03 (1.02~1.03)	<0.001	1.02 (1.01~1.02)	<0.001
Anion gap	1.04 (1.03~1.05)	<0.001	1 (0.98~1.03)	0.788	1.04 (1.03~1.05)	<0.001	1.01 (0.99~1.03)	0.273	1.03 (1.03~1.04)	<0.001	1.01 (0.99~1.03)	0.226
Bicarbonate	0.97 (0.96~0.98)	<0.001	1 (0.97~1.02)	0.78	0.97 (0.97~0.98)	<0.001	1.01 (0.98~1.03)	0.502	0.98 (0.97~0.99)	<0.001	1.01 (0.99~1.03)	0.345
BUN	1.01 (1.01~1.01)	<0.001	1 (1~1.01)	0.012	1.01 (1.01~1.01)	<0.001	1 (1~1.01)	0.001	1.01 (1.01~1.01)	<0.001	1 (1~1.01)	0.001
Creatinine	1.05 (1.02~1.08)	0.001	0.89 (0.84~0.94)	<0.001	1.05 (1.03~1.08)	<0.001	0.89 (0.85~0.93)	<0.001	1.06 (1.04~1.09)	<0.001	0.9 (0.86~0.94)	<0.001
Glucose	1 (1~1)	0.217	1 (1~1)	0.051	1 (1~1)	0.216	1 (1~1)	0.035	1 (1~1)	0.743	1 (1~1)	0.002
Calcium	1.01 (0.97~1.06)	0.58	0.98 (0.93~1.04)	0.549	1 (0.96~1.05)	0.895	0.96 (0.92~1.01)	0.097	1.01 (0.98~1.05)	0.475	0.97 (0.93~1.01)	0.145
Chloride	0.98 (0.97~0.99)	<0.001	0.97 (0.95~0.99)	0.008	0.98 (0.98~0.99)	<0.001	0.98 (0.96~1)	0.053	0.98 (0.98~0.99)	<0.001	0.98 (0.96~1)	0.055
Sodium	0.99 (0.99~1)	0.177	1.03 (1.01~1.05)	0.017	0.99 (0.99~1)	0.186	1.02 (1~1.04)	0.076	0.99 (0.99~1)	0.072	1.02 (1~1.04)	0.099
Potassium	1.15 (1.09~1.21)	<0.001	1.1 (1.03~1.17)	0.003	1.14 (1.09~1.2)	<0.001	1.09 (1.03~1.15)	0.005	1.15 (1.1~1.2)	<0.001	1.1 (1.04~1.16)	0.001
Vasopressor, yes	2.61 (2.29~2.96)	<0.001	2 (1.71~2.33)	<0.001	2.35 (2.1~2.62)	<0.001	1.82 (1.59~2.09)	<0.001	2.13 (1.93~2.35)	<0.001	1.71 (1.51~1.92)	<0.001
Inotropic, yes	1.28 (1.12~1.47)	<0.001	1.05 (0.9~1.23)	0.529	1.24 (1.1~1.4)	<0.001	1.03 (0.9~1.19)	0.649	1.14 (1.02~1.28)	0.023	0.97 (0.85~1.11)	0.638
CRRT, yes	2.14 (1.89~2.42)	<0.001	1.22 (1.05~1.43)	0.01	2.13 (1.9~2.38)	<0.001	1.27 (1.1~1.46)	0.001	1.96 (1.77~2.18)	<0.001	1.22 (1.08~1.39)	0.002
Invasive ventilation, yes	1.28 (1.1~1.48)	0.001	1.15 (0.97~1.36)	0.109	1.2 (1.06~1.37)	0.005	1.15 (0.99~1.33)	0.067	1.08 (0.96~1.21)	0.193	1.09 (0.96~1.24)	0.169
