# Supplementary material for: Nonlinear relationship between fibrinogen-to-albumin ratio and mortality in critically ill patients with sepsis: a retrospective cohort study
Source: Front Nutr. 2025 Jun 18;12:1562091. doi: 10.3389/fnut.2025.1562091 (PMC12213360; doi:10.3389/fnut.2025.1562091)
Supplement: Supplementary file 4 [file Table_4.xlsx]

## Sheet: Subgroup
			90-day mortality				1-year mortality
Subgroup	Variable	n	Event, n(%)	Adjusted HR (95%CI)	P for interaction		Event, n(%)	Adjusted HR (95%CI)	P for interaction
Age <70					0.228				0.214
	Q1	835	294 (35.2)	1.33 (1.09~1.62)			326 (39)	1.21 (1.01~1.45)
	Q3	673	201 (29.9)	1.21 (0.98~1.49)			242 (36)	1.19 (0.98~1.44)
	Q4	682	203 (29.8)	1.07 (0.86~1.33)			253 (37.1)	1.1 (0.91~1.34)
Age ≥70
	Q1	319	110 (34.5)	0.95 (0.74~1.24)			132 (41.4)	0.91 (0.72~1.15)
	Q3	481	230 (47.8)	1.25 (1.01~1.56)			284 (59)	1.3 (1.07~1.58)
	Q4	472	249 (52.8)	1.36 (1.08~1.71)			307 (65)	1.4 (1.14~1.71)
Female					0.435				0.595
	Q1	460	171 (37.2)	1.15 (0.91~1.47)			194 (42.2)	1.05 (0.84~1.31)
	Q3	463	171 (36.9)	1.21 (0.96~1.53)			209 (45.1)	1.21 (0.98~1.49)
	Q4	498	206 (41.4)	1.26 (0.99~1.59)			249 (50)	1.26 (1.01~1.56)
Male
	Q1	694	233 (33.6)	1.21 (0.99~1.49)			264 (38)	1.12 (0.93~1.35)
	Q3	691	260 (37.6)	1.26 (1.04~1.54)			317 (45.9)	1.27 (1.06~1.52)
	Q4	656	246 (37.5)	1.17 (0.95~1.44)			311 (47.4)	1.22 (1.01~1.47)
Diabetes mellitus					0.202				0.542
No	Q1	911	324 (35.6)	1.22 (1.02~1.45)			365 (40.1)	1.14 (0.97~1.34)
	Q3	784	270 (34.4)	1.18 (0.99~1.41)			329 (42)	1.19 (1.01~1.4)
	Q4	796	302 (37.9)	1.13 (0.94~1.36)			375 (47.1)	1.19 (1.01~1.41)
Yes
	Q1	243	80 (32.9)	1.09 (0.77~1.54)			93 (38.3)	0.94 (0.69~1.27)
	Q3	370	161 (43.5)	1.41 (1.05~1.9)			197 (53.2)	1.37 (1.06~1.78)
	Q4	358	150 (41.9)	1.41 (1.03~1.92)			185 (51.7)	1.32 (1.01~1.73)
Severe liver disease					0.191				0.163
No	Q1	792	218 (27.5)	1.17 (0.97~1.42)			256 (32.3)	1.09 (0.92~1.29)
	Q3	1048	377 (36)	1.26 (1.06~1.49)			462 (44.1)	1.27 (1.1~1.48)
	Q4	1118	436 (39)	1.22 (1.02~1.44)			540 (48.3)	1.25 (1.07~1.46)
Yes
	Q1	362	186 (51.4)	1.15 (0.87~1.51)			202 (55.8)	1.04 (0.81~1.35)
	Q3	106	54 (50.9)	1.1 (0.77~1.59)			64 (60.4)	1.09 (0.78~1.52)
	Q4	36	16 (44.4)	0.84 (0.48~1.46)			20 (55.6)	0.91 (0.56~1.49)
Metastatic solid tumor					0.581				0.251
No	Q1	1129	385 (34.1)	1.17 (1~1.38)			438 (38.8)	1.08 (0.93~1.24)
	Q3	1070	378 (35.3)	1.29 (1.1~1.51)			459 (42.9)	1.27 (1.11~1.47)
	Q4	1063	383 (36)	1.15 (0.97~1.35)			480 (45.2)	1.17 (1.01~1.36)
Yes
	Q1	25	19 (76)	1.47 (0.76~2.83)			20 (80)	1.45 (0.77~2.73)
	Q3	84	53 (63.1)	0.82 (0.48~1.39)			67 (79.8)	0.98 (0.59~1.62)
	Q4	91	69 (75.8)	1.14 (0.68~1.93)			80 (87.9)	1.34 (0.81~2.21)
SOFA					0.21				0.445
No	Q1	133	14 (10.5)	0.91 (0.44~1.85)			19 (14.3)	0.79 (0.43~1.46)
	Q3	171	41 (24)	1.55 (0.9~2.67)			57 (33.3)	1.59 (1.01~2.52)
	Q4	150	42 (28)	1.61 (0.91~2.85)			51 (34)	1.46 (0.9~2.39)
Yes
	Q1	1021	390 (38.2)	1.23 (1.05~1.44)			439 (43)	1.14 (0.98~1.32)
	Q3	983	390 (39.7)	1.23 (1.05~1.43)			469 (47.7)	1.23 (1.07~1.42)
	Q4	1004	410 (40.8)	1.16 (0.98~1.36)			509 (50.7)	1.2 (1.04~1.39)
CRRT					0.014				0.003
No	Q1	923	271 (29.4)	1.25 (1.04~1.51)			316 (34.2)	1.14 (0.97~1.34)
	Q3	979	340 (34.7)	1.43 (1.2~1.7)			422 (43.1)	1.41 (1.21~1.64)
	Q4	964	349 (36.2)	1.28 (1.07~1.54)			447 (46.4)	1.33 (1.13~1.57)
Yes
	Q1	231	133 (57.6)	1 (0.75~1.34)			142 (61.5)	0.96 (0.72~1.26)
	Q3	175	91 (52)	0.8 (0.58~1.1)			104 (59.4)	0.84 (0.62~1.13)
	Q4	190	103 (54.2)	0.91 (0.66~1.25)			113 (59.5)	0.9 (0.67~1.22)
